# Supplementary material for: Advances in risk assessment and prophylaxis for central nervous system relapse in diffuse large B-cell lymphoma
Source: PubMed Central journal article supplement — Haematologica. 2018 Dec 20;104(1):25–34. doi: 10.3324/haematol.2018.195834 (PMC6312016; doi:10.3324/haematol.2018.195834), 2019-01
Supplement: 2018_195834-Disclosures_and_Contributions.pdf [file 2018_195834-Disclosures_and_Contributions.pdf]

Haematologica  
HAEMATOL/2018/195834  
Version 4

Advances in risk assessment and prophylaxis for central nervous  
system relapse in diffuse large B-cell lymphoma

David Qualls and Jeremy S. Abramson

Disclosures: Dr. Qualls has nothing to disclose Dr. Abramson discloses consulting for Abbvie, Amgen, Bayer, Celgene, Gilead, Janssen, Juno therapeutics, Karyopharm, Kite pharma, Merck, Novartis, Seattle Genetics, Verastem

Contributions: DQ and JA wrote and edited the manuscript
