# Supplementary material for: Advances in risk assessment and prophylaxis for central nervous system relapse in diffuse large B-cell lymphoma
Source: PubMed Central journal article supplement — Haematologica. 2018 Dec 20;104(1):25–34. doi: 10.3324/haematol.2018.195834 (PMC6312016; doi:10.3324/haematol.2018.195834), 2019-01
Supplement: HAEMATOL-2018-195834v4-Qualls-01.pdf [file HAEMATOL-2018-195834v4-Qualls-01.pdf]

# Current information on most recent advances regarding CNS risk assessment and approaches to CNS prophylaxis in patients with DLBCL

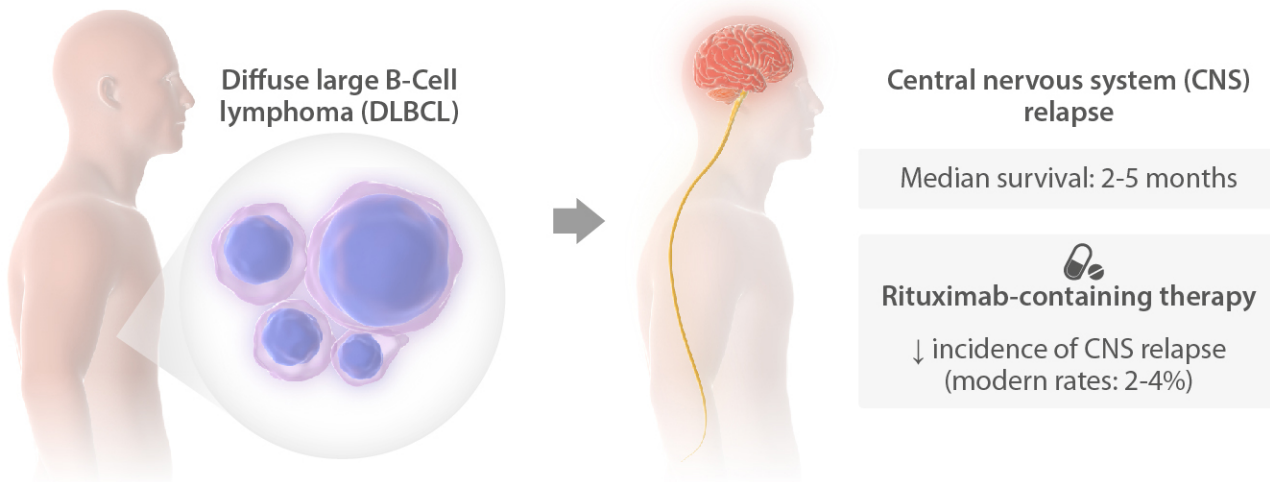

## Clinical risk models: International Prognostic Index (IPI) scores

5 risk factors

- 1- Age > 60 years
- 2- Elevated lactate dehydrogenase (LDH)
- 3- Eastern Cooperative Oncology Group Performance Status (ECOG-PS) > 1
- 4- Advanced stage disease
- 5- Involvement of more than one extranodal site

## High-risk extranodal sites

- Testicular involvement\*
  - Bone marrow
  - Paranasal sinus
  - Orbital
  - Pericardial
  - Ovarian
  - Uterine
  - Breast
  - Kidney
  - Adrenal involvement
- \*CNS relapse rates: 12-25%

## Biologic risk factors

- *MYC* rearrangement
- Translocations of *MYC* and *BCL2* and/or *BCL6* (**double- or triple-hit lymphoma**)\*

\* Median overall survival: > 2 years

## CNS prophylaxis

- **Intrathecal therapy:** methotrexate
- **Systemic chemotherapy:** methotrexate, ibuprofen, lenalidomide
